# Supplementary material for: Extensive Co-Operation between the Epstein-Barr Virus EBNA3 Proteins in the Manipulation of Host Gene Expression and Epigenetic Chromatin Modification
Source: PubMed Central journal article supplement (PMC2981562; doi:10.1371/journal.pone.0013979), 2010-11-15

Figure S3

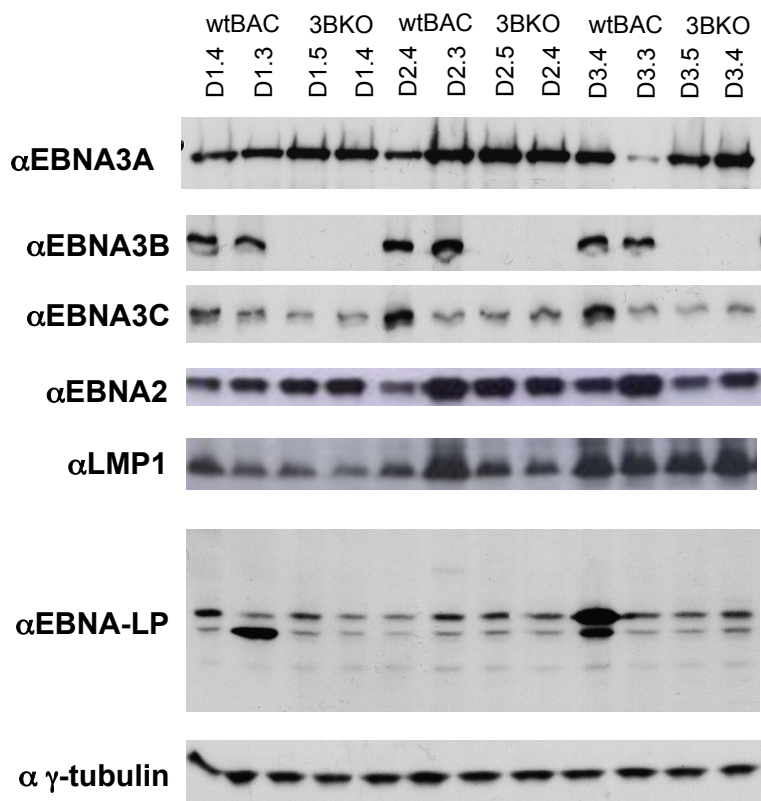

Supplement: pone.0013979.s004.pdf [file pone.0013979.s004.pdf]
